# Supplementary material
Source: Springer Nature journal article supplement (https://www.springermedizin.de/resource/supplementary/12967_2011_966_MOESM7_ESM.pdf/9577188)

**a**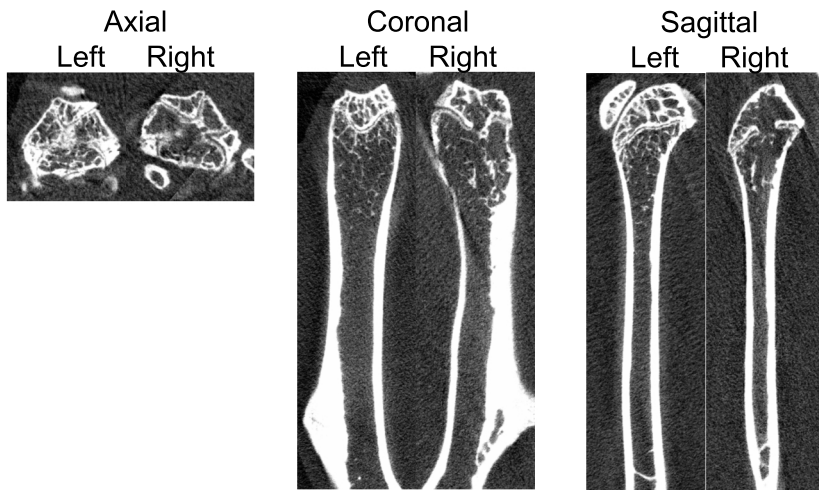**b**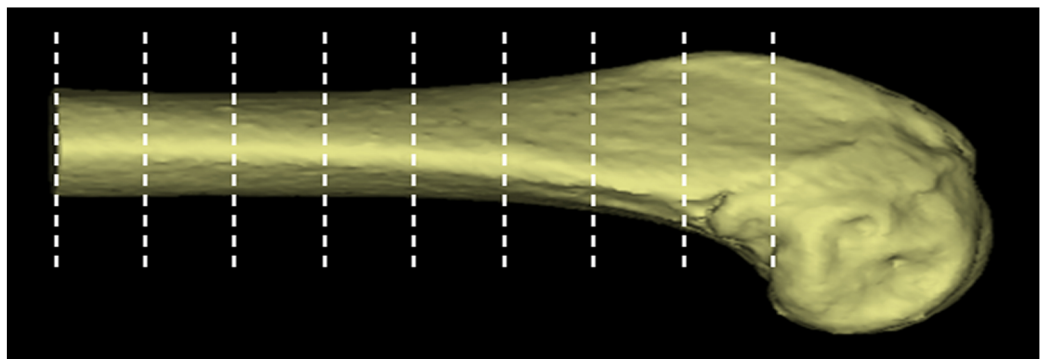

Contra

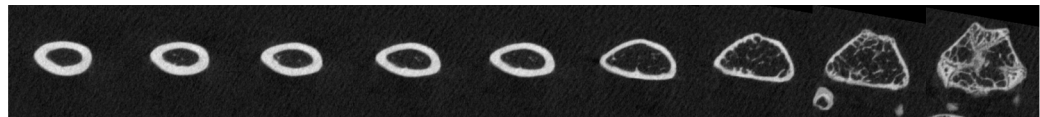

Tumor

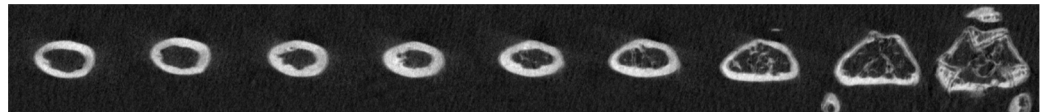

Supplement: MOESM7 [file 9577188]
